# Supplementary material for: Modeling of the Progressive Degradation of the Nigrostriatal Dopaminergic System in Mice to Study the Mechanisms of Neurodegeneration and Neuroplasticity in Parkinson’s Disease
Source: MDPI journal article supplement (doi:10.3390/ijms24010683), 2022-12-30
Supplement: s1 [file s1]

**Supplementary Table S1.** The concentrations of dopamine, 3,4-dihydroxyphenylacetic acid (DOPAC), homovanillic acid (HVA), and 3-methoxytyramine (3-MT) in the striatum of mice 24 hours after a single injection of 1-methyl-4-phenyl-1,2,3,6-tetrahydropyridine (MPTP) at a dose of 40 mg/kg or after each of the successive injections of 1-methyl-4-phenyl-1,2,3,6-tetrahydropyridine (MPTP) at increasing doses from 8 to 40 mg/kg. Control group received 0.9% NaCl according to the same schemes.

| Group,<br>0,9% NaCl<br>or MPTP<br>(mg/kg) | Dopamine,<br>pmol/mg | <i>p</i> * | DOPAC,<br>pmol/mg | <i>p</i> * | HVA,<br>pmol/mg | <i>p</i> * | 3-MT,<br>pmol/mg | <i>p</i> * |
|-------------------------------------------|----------------------|------------|-------------------|------------|-----------------|------------|------------------|------------|
| <b>Single injection of MPTP</b>           |                      |            |                   |            |                 |            |                  |            |
| Control                                   | 103.1 ± 2.0          |            | 6.3 ± 0.4         |            | 12.0 ± 0.6      |            | 2.0 ± 0.2        |            |
| 40mg/kg                                   | 25.4 ± 3.3           | 1.5E-09    | 2.7 ± 0.2         | 7.13E-05   | 8.1 ± 0.7       | 1.93E-03   | 1.1 ± 0.1        | 2.77E-03   |
| <b>Successive injections of MPTP</b>      |                      |            |                   |            |                 |            |                  |            |
| Control                                   | 110.4 ± 3.6          |            | 9.4 ± 0.2         |            | 9.2 ± 0.2       |            | 3.1 ± 0.3        |            |
| 8                                         | 91.9 ± 1.9           | 1.1E-03    | 8.1 ± 0.4         | 0.02       | 8.7 ± 0.5       | 0.39       | 2.9 ± 0.1        | 0.58       |
| 8-10                                      | 51.8 ± 3.0           | 1.8E-07    | 5.3 ± 0.2         | 3.5E-07    | 7.4 ± 0.6       | 0.03       | 2.3 ± 0.2        | 0.08       |
| Control                                   | 102.1 ± 2.3          |            | 6.4 ± 0.4         |            | 10.1 ± 1.0      |            | 2.7 ± 0.3        |            |
| 8-10-12                                   | 34.1 ± 1.5           | 3.0E-07    | 3.0 ± 0.1         | 1.9E-04    | 5.5 ± 0.3       | 1.6E-03    | 1.8 ± 0.2        | 0.04       |
| Control                                   | 103.2 ± 2.8          |            | 8.8 ± 0.2         |            | 10.4 ± 0.2      |            | 2.7 ± 0.4        |            |
| 8-10-12-16                                | 31.0 ± 1.6           | 7.2E-10    | 3.6 ± 0.2         | 2.1E-08    | 6.2 ± 0.5       | 2.6E-05    | 1.8 ± 0.3        | 0.13       |
| Control                                   | 98.8 ± 1.9           |            | 7.3 ± 0.3         |            | 9.8 ± 0.2       |            | 3.1 ± 0.1        |            |
| 8-10-12-16-20                             | 35.1 ± 3.0           | 5.7E-09    | 3.9 ± 0.3         | 1.5E-05    | 8.2 ± 0.5       | 0.01       | 3.4 ± 0.2        | 0.17       |
| Control                                   | 107.5 ± 3.6          |            | 6.0 ± 0.4         |            | 7.6 ± 0.5       |            | 3.1 ± 0.4        |            |
| 8-10-12-16-20-26                          | 29.1 ± 1.0           | 4.1E-12    | 2.5 ± 0.3         | 0.01       | 5.3 ± 0.5       | 0.01       | 2.0 ± 0.2        | 6.9E-01    |
| Control                                   | 104.6 ± 3.3          |            | 7.9 ± 0.2         |            | 9.2 ± 0.1       |            | 1.6 ± 0.2        |            |
| 8-10-12-16-20-26-40                       | 26.7 ± 1.2           | 6.0E-12    | 2.7 ± 0.3         | 5.1E-09    | 6.4 ± 0.7       | 0.01       | 0.8 ± 0.1        | 2.04E-04   |

*p*\* calculated relative to the control group.

**Supplementary Table S2.** The content of dopamine, 3,4-dihydroxyphenylacetic acid (DOPAC) and homovanillic acid (HVA) in the substantia nigra of mice 24 hours after a single injection of 1-methyl-4-phenyl-1,2,3,6-tetrahydropyridine (MPTP) at a dose of 40 mg/kg or after each of the successive injections of 1-methyl-4-phenyl-1,2,3,6-tetrahydropyridine (MPTP) at increasing doses from 8 to 40 mg/kg. Control group received 0.9% NaCl according to the same schemes.

| Group. 0.9% NaCl or MPTP<br>(mg/kg)  | Dopamine.<br>pmol | <i>p</i> * | DOPAC.<br>pmol | <i>p</i> * | HVA.<br>pmol | <i>p</i> * |
|--------------------------------------|-------------------|------------|----------------|------------|--------------|------------|
| <b>Single injection of MPTP</b>      |                   |            |                |            |              |            |
| Control                              | 8.9 ± 0.5         |            | 2.8 ± 0.2      |            | 4.1 ± 0.2    |            |
| 40                                   | 7.0 ± 0.6         | 0.03       | 1.9 ± 0.2      | 0.02       | 3.9 ± 0.2    | 0.43       |
| <b>Successive injections of MPTP</b> |                   |            |                |            |              |            |
| Control                              | 6.9 ± 0.7         |            | 2.6 ± 0.2      |            | 3.7 ± 0.2    |            |
| 8                                    | 7.5 ± 0.5         | 0.5        | 2.1 ± 0.1      | 0.03       | 4.5 ± 0.3    | 0.051      |
| 8-10                                 | 6.8 ± 0.3         | 0.94       | 2.3 ± 0.1      | 0.23       | 4.7 ± 0.5    | 0.11       |
| Control                              | 6.2 ± 0.3         |            | 2.3 ± 0.1      |            | 3.3 ± 0.3    |            |
| 8-10-12                              | 5.5 ± 0.4         | 0.18       | 1.7 ± 0.0      | 0.005      | 2.8 ± 0.2    | 0.13       |
| Control                              | 7.3 ± 0.4         |            | 2.1 ± 0.2      |            | 3.2 ± 0.2    |            |
| 8-10-12-16                           | 5.8 ± 0.4         | 0.03       | 1.7 ± 0.2      | 0.08       | 2.8 ± 0.2    | 0.22       |
| Control                              | 8.2 ± 0.4         |            | 2.1 ± 0.1      |            | 3.3 ± 0.2    |            |
| 8-10-12-16-20                        | 4.4 ± 0.2         | 4.9E-05    | 1.5 ± 0.1      | 3.7E-04    | 3.0 ± 0.1    | 0.30       |
| Control                              | 7.1 ± 0.3         |            | 2.4 ± 0.2      |            | 2.4 ± 0.1    |            |
| 8-10-12-16-20-26                     | 7.1 ± 0.3         | 8.4E-04    | 1.2 ± 0.2      | 1.1E-04    | 2.0 ± 0.2    | 0.07       |
| Control                              | 7.8 ± 0.5         |            | 2.4 ± 0.2      |            | 3.4 ± 0.2    |            |
| 8-10-12-16-20-26-40                  | 4.3 ± 0.3         | 2.1E-05    | 1.0 ± 0.1      | 1.0E-08    | 3.5 ± 0.2    | 0.76       |

*p*\* calculated relative to the control group.

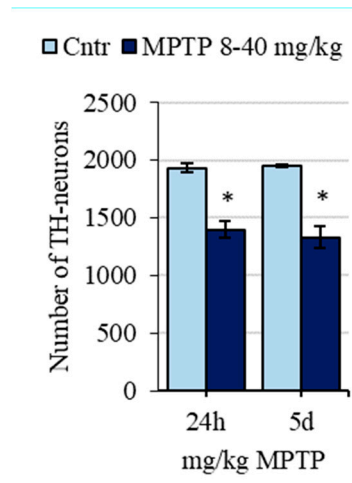

**Figure S1.** The number of tyrosine hydroxylase (TH)-immunopositive neurons in the substantia nigra 24 hours and 5 days after successive MPTP injections at increasing doses from 8 to 40 mg/kg ("n" per group = 5). \* $p < 0.05$ , significant differences compared with the control (Mann-Whitney U-test).
